# Supplementary material
Source: publisher figshare collection journal article supplement (https://gsajournals.figshare.com/ndownloader/files/13837937)
Supplement: Supplementary file 1 [file 13837937]

## Sheet: S3a
Supplementary Table S3a. DESeq2 output and associated ShortStack raw Counts dataset parameters summarized for target functions below, and normalized reads per 20M for visualization of in vitro plantlet UV effects.																														raw Counts				noUV1	noUV2	plusUV1	plusUV2
							Independent Filtering adjusted: tested 172 miRNAs/phasi loci																						total clean reads	2385338	5123375	1630116	3134507	normalized20M
filerow	Name	baseMean	log2FoldChange	lfcSE	stat	pvalue	padj Bonf-FDR, 172 phasis/miRNAs	annot	Locus	Length	Reads	RPM	UniqueReads	FracTop	Strand	MajorRNA	MajorRNAReads	Complexity	DicerCall	MIRNA	PhaseScore	Short	Long	X20	X21	X22	X23	X24	main reads	1_CGATGT-trim-TEsrt25S	2_CGGAAT-trim-TEsrt25S	3_GATCAG-trim-TEsrt25S	4_TCATTC-trim-TEsrt25S	1_CGATGT-trim-TEsrt25S	2_CGGAAT-trim-TEsrt25S	3_GATCAG-trim-TEsrt25S	4_TCATTC-trim-TEsrt25S	ratio-UV
24662	Cluster_32423	18.0104	1.66919	0.730458	2.28513	0.0223051	0.0224356	vvi-miR5225	NC_012023.3_Vitis_vinifera_cultivar_PN40024_chromosome_17,_12X,_whole_genome_shotgun_sequence:5927854-5927954	101	15142	29.441	18	0.959	+	UCCCAGGAGAGAUGGCACCUGC	13742	0.009	22	N13	-1	265	3	32	153	14495	171	23	15142	7	5	6	64	58.6919	19.5184	73.6144	408.358	6.16252
15245	Cluster_23852	106.864	1.18145	0.530276	2.22799	0.025881	0.0261855	vvi-MIR160e	NC_012019.3_Vitis_vinifera_cultivar_PN40024_chromosome_13,_12X,_whole_genome_shotgun_sequence:5447922-5448033	112	9502	18.475	8072	0.994	+	GCGUAUGAGGAGCCAUGCAUA	6971	0.019	21	Y	-1	39	18	150	8925	341	19	10	9502	70	62	94	211	586.919	242.028	1153.29	1346.3	3.01539
16028	Cluster_24562	11828.4	0.943913	0.47236	1.99829	0.0456852	0.0464221	miR482trigger.	NC_012019.3_Vitis_vinifera_cultivar_PN40024_chromosome_13,_12X,_whole_genome_shotgun_sequence:15496204-15497757	1554	1470615	2859.4	1287301	0.391	.	UCGGAUAAAGGGUUAUACUUC	143659	0.011	21	N5	1736.6	18099	7712	62902	1063241	230705	31348	56608	1470615	6824	11244	7925	25144	57216.2	43892.9	97232.3	160434	2.54839
24600	Cluster_32367	12514.9	0.630475	0.468949	1.34444	0.178805	0.206406	vvi-MIR482	NC_012023.3_Vitis_vinifera_cultivar_PN40024_chromosome_17,_12X,_whole_genome_shotgun_sequence:5522830-5523995	1166	554104	1077.38	553644	0.947	+	UCUUUCCUACUCCUCCCAUUCC	269435	0.002	22	N5	-1	3587	784	15540	242526	287002	1079	3586	554104	7980	14638	8020	23851	66908.8	57142	98397.9	152183	2.01999
Table S3a summary. Differential expression of miRNAs in in vitro plantlets subjected to UV-B radiation. C: Conserved miRNA; NC: Non-conserved miRNA; N: Novel miRNA
miRNA	log2FC	P value*	Validated Targets	Species in which targets are predicted	C/NC/N	miRNA-triggered Phasi Locus	Short-Stack Phase Score	Reference
vvi-MIR5225	1.67	0.022	calcium-transporting ATPase10, 5' UTR intron	Medicago truncatula	C		121.3	Xia et al., 2013
				Ammopiptanthus mongolicus				Gao et al., 2016
vvi-MIR160e	1.18	0.026	Four Auxin Response factors ARF 10/16/17-like	Many	C			Pantaleo et al., 2010
only 17% as abundant as star
								This report
vvi-MIR482	0.63	0.21	14 NBS-LRRs$	gymnosperms, dicots	C	TAS11; NC_012019.3_chr13:	1737	This report Shivaprasad et al., 2012; Xia, Meyers, Liu, Beers, & Ye, 2013; Li et al., 2012
						15496204-15497757^
*Bonferroni-Hochberg Family-wise False Discovery Rate-adjusted (α=0.1) , based on all 172 MIRNA loci tested.
^ log2FC by UV treatment = 0.94, P = 0.05. Candidate TAS-like locus, based on NCBI GenBank ESTs XR_002031633.1 and XR_787251.2 "uncharacterized ncRNA"; no homology to sly-TAS5 (Li et al., 2012). Overlaps 5' end of VIT_13s0047g00100.
$ TAS11 siRNA 3'D3(-) targets two LRRs supported by PhaseTank analysis of degradome (Pantaleo et al., 2010); VIT_18s0001g07270 (phase score=93.5) and VIT_13s0106g00020 (phase score=29.2). See Supplementary Table 2b for 12 other LRR predicted targets of TAS11-3'D3(-), Supplementary Table 4 and Supplementary File S5.

## Sheet: S3b
Supplementary Table S3b. DESeq2 output and associated ShortStack raw Counts dataset parameters summarized for target functions below, and normalized reads per 20M for visualization of UV and developmental time effects.																														raw ShortStack counts
																													berry devt stage	minus3	veraison	plus3	plus6	minus3	veraison	plus3	plus6	minus3	veraison	plus3	plus6	minus3	veraison	plus3	plus6	minus3	veraison	plus3	plus6
																													UV fluence	High	High	High	High	High	High	High	High	Low	Low	Low	Low	Low	Low	Low	Low	Field	Field	Field	Field
							Independent Filtering-adjusted: 81 miRNAs phasi loci tested (removed select loci from family-wise base [172] if DESeq2 low counts <7.8 base mean reads/library discarded)																						UV?	no UV	no UV	no UV	no UV	plus UV	plus UV	plus UV	plus UV	no UV	no UV	no UV	no UV	plus UV	plus UV	plus UV	plus UV	no UV	no UV	no UV	no UV
																													total clean counts	1774867	6951342	6310050	2621588	1332615	2719800	5540540	5319529	5150409	5825441	5576963	6494095	4096788	10736084	3991024	4308456	3372149	3983814	3870446	8396218
filerow	Name	baseMean	log2FoldChange	lfcSE	stat	pvalue	padj Bonf-FDR	annot	Locus	Length	Reads	RPM	UniqueReads	FracTop	Strand	MajorRNA	MajorRNAReads	Complexity	DicerCall	MIRNA	PhaseScore	Short	Long	X20	X21	X22	X23	X24	main reads	span5_cat_cleancomplete	X9_TAGCTT.trim.TEsrt25S	X13_GTGAAA.trim.TEsrt25S	X17_GTCCGC.trim.TEsrt25S	X7_ACTTGA.trim.TEsrt25S	X11_GGCTAC.trim.TEsrt25S	X15_GTGGCC.trim.TEsrt25S	X19_CGTACG.trim.TEsrt25S	X21_ATCACG.trim.TEsrt25S	X25_TGACCA.trim.TEsrt25S	X29_AGTCAA.trim.TEsrt25S	X33_GAGTGG.trim.TEsrt25S	X23_TTAGGC.trim.TEsrt25S	X27_ACAGTG.trim.TEsrt25S	X31_AGTTCC.trim.TEsrt25S	X35_GGTAGC.trim.TEsrt25S	X37_CCGTCC.trim.TEsrt25S	X41_GCCAAT.trim.TEsrt25S	X45_ATGTCA.trim.TEsrt25S	X588_AGTCAA_span49.trim18.TEsrt25S
24765	Cluster_32517	6.52773	1.45873	0.379834	3.84046	0.000122806	0.000124341	vvi-MIR395n_maj_sp_offset9nt3'_mature	NC_012023.3_Vitis_vinifera_cultivar_PN40024_chromosome_17,_12X,_whole_genome_shotgun_sequence:6408985-6409131	147	291	0.566	291	0.021	-	UUUGGAGGAACUCUUGGUGCC	194	0.069	21	N15	-1	23	1	12	239	14	0	2	291	3	1	2	1	2	1	19	9	0	3	0	3	20	26	11	2	1	5	4	12
19863	Cluster_28062	8.79552	1.27945	0.338633	3.77828	0.000157913	0.000161911	vvi-MIR3627	NC_012020.3_Vitis_vinifera_cultivar_PN40024_chromosome_14,_12X,_whole_genome_shotgun_sequence:28302570-28302659	90	14317	27.837	14310	0.531	.	CUUGUCACAGGAGAGCGGCGA	5538	0.017	21	N6	63	67	0	491	9837	3850	59	13	14317	6	12	13	1	12	25	17	33	4	6	0	2	7	20	2	2	9	2	1	1
4393	Cluster_13991	146.493	1.01232	0.272604	3.71353	0.00020439	0.000212251	vvi-MIR535c-likely(highexpression)_could_535a_ambig_map	NW_003724168.1_Vitis_vinifera_cultivar_PN40024_chromosome_7_unlocalized_genomic_scaffold,_12X_scaffold_161.assembly12x,_whole_genome_shotgun_sequence:387666-387808	143	1788028	3476.56	2112	0.002	-	UGACAACGAGAGAGAGCACGC	1727670	0	21	Y	-1	958	47	4461	1772307	8834	1171	250	1788028	14	153	168	15	13	107	162	471	344	83	80	295	481	1204	327	262	104	34	72	124
4674	Cluster_14246	142.088	0.938126	0.253936	3.69433	0.000220463	0.000231916	vvi-MIR3624*-5p	NC_012014.3_Vitis_vinifera_cultivar_PN40024_chromosome_8,_12X,_whole_genome_shotgun_sequence:2139056-2139533	478	115132	223.857	5133	0.444	.	AGUAGUAUGCUGCUGCCCUGA	58411	0.006	21	N6	373.3	746	48	5524	104224	3691	745	154	115132	10	166	288	65	31	221	500	580	108	107	144	413	146	519	216	284	70	58	38	79
12850	Cluster_21674	66.5797	0.744775	0.266376	2.79595	0.00517467	0.00551511	vvi-MIR171b	NC_012018.3_Vitis_vinifera_cultivar_PN40024_chromosome_12,_12X,_whole_genome_shotgun_sequence:5542345-5542534	190	5913	11.497	5909	0.187	-	UUGAGCCGCGUCAAUAUCUCC	4350	0.021	21	Y	-1	91	12	124	5635	44	6	1	5913	11	140	85	9	15	74	68	105	242	60	20	45	68	412	23	46	56	47	33	47
19028	Cluster_27299	250.849	1.10178	0.394364	2.79382	0.00520898	0.0056257	TAS4b_majspD4minus	NC_012020.3_Vitis_vinifera_cultivar_PN40024_chromosome_14,_12X,_whole_genome_shotgun_sequence:21534542-21535069	528	2932436	5701.7	2898922	0.283	.	UGAAGGUCCGAGGUAGAGGCA	1951650	0.001	21	N6	7566.3	7245	635	13294	2878595	24122	2272	6273	2932436	1	6	7	0	0	4	13	16	5	3	6	29	4	15	11	11	491	209	65	77
13813	Cluster_22551	31.3623	0.704988	0.292933	2.40665	0.0160995	0.0176224	phasitrigger D6+ of vvi-slyTAS5-like chr:20665102-20666018; targets VIT12s0034g01310 LRR with 25 paralogues	NC_012018.3_Vitis_vinifera_cultivar_PN40024_chromosome_12,_12X,_whole_genome_shotgun_sequence:17318775-17320007	1233	5730	11.141	974	0.678	.	UGGGAUGGGAAAUUGUUCGGC	252	0.255	21	N5	16.8	86	56	144	4368	809	82	185	5730	28	32	52	13	12	62	83	62	48	3	18	72	41	72	21	12	9	9	28	30
15253	Cluster_2386	8.89715	-0.966778	0.414029	-2.33505	0.0195408	0.0216822	vvi-MIR477b	NC_012008.3_Vitis_vinifera_cultivar_PN40024_chromosome_2,_12X,_whole_genome_shotgun_sequence:1237520-1237866	347	10610	20.63	10602	0.995	+	GAAGCUCUUGAGGGGGACUG	5226	0.021	20	Y	-1	379	10	5516	4273	349	54	29	10610	47	9	7	1	0	3	22	5	3	15	1	18	0	1	0	0	8	3	9	22
1835	Cluster_11664	30.4768	-0.76923	0.335796	-2.29077	0.0219768	0.0247239	vvi-MIR530a	NC_012012.3_Vitis_vinifera_cultivar_PN40024_chromosome_6,_12X,_whole_genome_shotgun_sequence:17896016-17896161	146	4348	8.454	313	1	+	UCUGCAUUUGCACCUGCACCU	3627	0.017	21	N15	-1	10	31	125	4031	109	42	0	4348	1	81	196	56	0	26	88	92	17	49	62	69	0	109	10	1	9	15	57	34
19656	Cluster_27875	140.216	0.680119	0.302254	2.25016	0.0244389	0.027881	vvi-MIR156f	NC_012020.3_Vitis_vinifera_cultivar_PN40024_chromosome_14,_12X,_whole_genome_shotgun_sequence:26463634-26463840	207	7832522	15229.2	311040	0.948	+	UUGACAGAAGAUAGAGAGCAC	6686433	0	21	Y	-1	2985	244	139280	7182448	193383	8317	305865	7832522	13	141	151	25	13	152	433	280	160	53	69	287	82	1001	92	108	38	46	270	521
4558	Cluster_1414	71.8535	0.594369	0.264181	2.24986	0.0244581	0.0283015	unknown phasitrigger. target=unannotatedPPR; VIT_11s0016g02500 encoding PPR-DYW_deaminase-like with 28 paralogues.	NC_012007.3_Vitis_vinifera_cultivar_PN40024_chromosome_1,_12X,_whole_genome_shotgun_sequence:13356141-13357440	1300	17099	33.247	1059	0.463	.	CAUUAAAAGAUGGAGGCUGCA	3558	0.073	21	N5	98.4	205	64	324	15210	941	115	240	17099	32	107	101	22	13	73	170	121	107	85	62	203	30	244	75	53	33	41	36	53
533	Cluster_10483	8.41306	0.787369	0.390779	2.01487	0.0439183	0.0523144	vvi-miR4376	NC_012012.3_Vitis_vinifera_cultivar_PN40024_chromosome_6,_12X,_whole_genome_shotgun_sequence:3976346-3976502	157	55613	108.131	55099	0.058	-	UCGCAGGAGAGAUGACGCCGU	27887	0.008	21	Y	-1	175	106	882	32318	20085	1689	358	55613	6	9	10	0	2	12	6	10	23	3	2	0	10	26	0	4	17	7	0	0
14791	Cluster_2344	186.13	0.676622	0.338855	1.99679	0.045848	0.0554282	vvi-MIR319c	NC_012008.3_Vitis_vinifera_cultivar_PN40024_chromosome_2,_12X,_whole_genome_shotgun_sequence:855544-855757	214	48131	93.584	12089	0.059	-	UUGGACUGAAGGGAGCUCCC	13421	0.015	21	Y	-1	491	19	18948	21220	5761	1548	144	48131	134	207	100	34	123	363	1120	230	319	52	80	383	50	437	165	176	107	56	34	435
Table S3b summary. Differential expression of miRNAs in berries subjected to UV-B radiation. C: Conserved miRNA; NC: Non-conserved miRNA; N: Novel miRNA
miRNA	log2FC	P value*	Validated Targets	Species in which targets are predicted	C/NC/N	Phasi Locus	ShortStack Phase Score	Reference
vvi-MIR395n	1.46	0.0001	ATP sulfurylase 1; AST68, Low affinity sulfate transporter (miR395l,h)	Many	C			Paim-Pinto et al., 2016; Sun et al., 2015
vvi-MIR3627-5p isomiR	1.28	0.0002	calcium-transporting ATPase10, 5' UTR intron2	Grapevine, peach, apple	C		121.3	Xia et al., 2013; Gao et al. 2016
							for MIRNA=63
vvi-MIR535c	1.01	0.0002		Many	C			Carra et al., 2009
			DNA primase large SU; SPLs (bulge at nt6 seed region)					Pantaleo et al., 2010
								Han et al., 2016
								Paim-Pinto et al., 2016
vvi-MIR3624-3p	0.94	0.0002	METAL ION BINDING PROTEIN-RELATED, Proline-rich family protein	Grapevine	NC		373.3	Sun et al., 2015
							for MIRNA	Pagliarani et al., 2017
								this report
vvi-MIR171b isomiR	0.74	0.006	GRAS family scarecrow-like protein	Many	C			Pantaleo et al., 2010; Wang et al., 2013
			SCR4-L SCR-L22 SCR-L15
vvi-MIR477b	-0.97	0.02	repC/Pol III GAMMA-TAU SU; Elongation factor 1B-gamma; EDA9, D-3-phosphoglycerate dehydrogenase
mature is only 0.5% of star species
				Dicots	C			Paim-Pinto et al., 2016
								This report
vvi-MIR530a	-0.77	0.025	AGO1 (two homologues, intron and 3' UTR); Plus3 domain; PPR DYW deaminase	many	C			Alabi et al., 2012; Han et al., 2016;
								Liang et al., 2013
vvi-MIR156f	0.68	0.028	9 squamosa promoter-binding-like SPL TFs	many	C			Pantaleo et al., 2010; Casati et al., 2013; Wang et al., 2013
vvi-miR4376	0.79	0.05	calcium-transporting ATPase10 5' UTR intron2	dicots	C		121.3	Wang et al., 2011; Xia et al., 2013
vvi-MIR319c	0.68	0.055	TCP4-L; TCP24-L	many	C			Paim-Pinto et al., 2016
vvi-MIR828	-0.48	NA		Eudicots, palms	C	Vv-TAS4b: NC_012020.3_chr14:	7566	Hsieh et al., 2009; Luo et al., 2012; Rock, 2013
						21534542-21535069^
vvi-MIR482	0.70$	0.018	10 NB-LRRs$	Gymnosperms, dicots	C	sly-TAS5-like NC_012024.3_chr18: 20665102-20666018 D12(-) à VIT_00s0238g00130; D(6+) à VIT_12s0034g01310 and VIT_12s0034g01350	2456.3	This report
								Li et al., 2012; Xia et al., 2013
unknown	0.59$	0.028			N	NC_012007.3_chr1:	98.4	This report
						13356141-13357440
						(Phasi trigger: unannotated PPR, VIT_11s0016g02500)
*Bonferroni-Hochberg Family-wise False Discovery Rate-adjusted (α=0.1) , based on all 172 MIRNA loci tested. NA: not analyzed due to low reads abundance.
$ LFC refers to candidate target phasi locus. NB-LRR VIT12s0034g01310 (phase score=342.8), predicted target of chr18 tasiRNA D6(+) identified by PhaseTank, and VIT_12s0034g01350 (phase score=398.3); Supplementary Table 4, File S5. Validated NB-ARC target of sly-TAS5-like tasiRNA D12(-) VIT_00s0238g00130 by degradome data, and seven other predicted NB-ARC targets (Suppl. Tables 2b and 4; Suppl. Fi…
^ TAS4b LFC by UV = 1.1 (P = 0.005; family-wise FDR-adjusted).
[truncated: 29 more columns]

## Sheet: S3c
Supplementary Table S3c. DESeq2 output and associated ShortStack raw Counts dataset parameters summarized for target functions below, and normalized reads per 20M for visualization of UV High fluence response vs. Low fluence.																														raw ShortStack counts
																													berry devt stage	minus3	veraison	plus3	plus6	minus3	veraison	plus3	plus6	minus3	veraison	plus3	plus6	minus3	veraison	plus3	plus6	minus3	veraison	plus3	plus6
																													UV fluence	High	High	High	High	High	High	High	High	Low	Low	Low	Low	Low	Low	Low	Low	Field	Field	Field	Field
							Independent Filtering-adjusted: 81 miRNAs phasi loci tested (removed select loci from family-wise base [172] if DESeq2 low counts <7.8 base mean reads/library discarded)																						UV?	no UV	no UV	no UV	no UV	plus UV	plus UV	plus UV	plus UV	no UV	no UV	no UV	no UV	plus UV	plus UV	plus UV	plus UV	no UV	no UV	no UV	no UV
																													total clean counts	1774867	6951342	6310050	2621588	1332615	2719800	5540540	5319529	5150409	5825441	5576963	6494095	4096788	10736084	3991024	4308456	3372149	3983814	3870446	8396218
filerow	Name	baseMean	log2FoldChange	lfcSE	stat	pvalue	padj Bonf-FDR	annot	Locus	Length	Reads	RPM	UniqueReads	FracTop	Strand	MajorRNA	MajorRNAReads	Complexity	DicerCall	MIRNA	PhaseScore	Short	Long	X20	X21	X22	X23	X24	main	span5_cat_cleancomplete	9_TAGCTT-trim-TEsrt25S	13_GTGAAA-trim-TEsrt25S	17_GTCCGC-trim-TEsrt25S	7_ACTTGA-trim-TEsrt25S	11_GGCTAC-trim-TEsrt25S	15_GTGGCC-trim-TEsrt25S	19_CGTACG-trim-TEsrt25S	21_ATCACG-trim-TEsrt25S	25_TGACCA-trim-TEsrt25S	29_AGTCAA-trim-TEsrt25S	33_GAGTGG-trim-TEsrt25S	23_TTAGGC-trim-TEsrt25S	27_ACAGTG-trim-TEsrt25S	31_AGTTCC-trim-TEsrt25S	35_GGTAGC-trim-TEsrt25S	37_CCGTCC-trim-TEsrt25S	41_GCCAAT-trim-TEsrt25S	45_ATGTCA-trim-TEsrt25S	588_AGTCAA_span49-trim18-TEsrt25S
19863	Cluster_28062	8.79552	2.02341	0.442016	4.57769	4.7e-06	4.75875e-06	vvi-MIR3627	NC_012020.3_Vitis_vinifera_cultivar_PN40024_chromosome_14,_12X,_whole_genome_shotgun_sequence:28302570-28302659	90	14317	27.837	14310	0.531	.	CUUGUCACAGGAGAGCGGCGA	5538	0.017	21	N6	63	67	0	491	9837	3850	59	13	14317	6	12	13	1	12	25	17	33	4	6	0	2	7	20	2	2	9	2	1	1
19140	Cluster_2740	35.7663	2.103	0.538109	3.90812	9.3e-05	9.53544e-05	vvi-MIR399i	NC_012008.3_Vitis_vinifera_cultivar_PN40024_chromosome_2,_12X,_whole_genome_shotgun_sequence:4101751-4101930	180	18869	36.688	18761	0.998	+	CGCCAAAGGAGAGUUGCCCUG	16000	0.009	21	Y	-1	408	13	384	17879	165	11	9	18869	4	162	116	42	1	54	397	38	4	1	26	108	0	6	3	0	6	10	18	55
4393	Cluster_13991	146.493	-1.18722	0.347952	-3.41201	0.000644852	0.000678351	vvi-MIR535c-likely(highexpression)_could_535a_ambig_map	NW_003724168.1_Vitis_vinifera_cultivar_PN40024_chromosome_7_unlocalized_genomic_scaffold,_12X_scaffold_161.assembly12x,_whole_genome_shotgun_sequence:387666-387808	143	1788028	3476.56	2112	0.002	-	UGACAACGAGAGAGAGCACGC	1727670	0	21	Y	-1	958	47	4461	1772307	8834	1171	250	1788028	14	153	168	15	13	107	162	471	344	83	80	295	481	1204	327	262	104	34	72	124
32154	Cluster_39236	22.046	1.37007	0.426744	3.21051	0.00132498	0.00141215	vvi-MIR167c	NW_003724203.1_Vitis_vinifera_cultivar_PN40024_unplaced_genomic_scaffold,_12X_scaffold_179.assembly12x,_whole_genome_shotgun_sequence:260012-260098	87	169089	328.769	152535	0.996	+	UGAAGCUGCCAGCAUGAUCUC	122086	0.002	21	Y	-1	1899	38	5426	135684	25371	281	390	169089	36	44	8	0	19	19	23	21	69	5	1	3	16	45	4	0	44	11	12	5
2064	Cluster_11876	33.93	1.61093	0.53407	3.01634	0.00255849	0.00276317	novel_vvi-477c	NC_012012.3_Vitis_vinifera_cultivar_PN40024_chromosome_6,_12X,_whole_genome_shotgun_sequence:19950746-19950825	80	16679	32.43	16093	0.013	-	GCUGGAAGCCGAUGGGGGACC	10006	0.012	21	Y	-1	235	4	5297	10992	106	6	39	16679	9	66	107	16	0	84	294	90	15	26	36	97	0	5	3	0	2	16	13	135
30815	Cluster_38020	72.1602	1.85205	0.620007	2.98715	0.00281591	0.00308228	novel_vvi-477e	NC_012025.3_Vitis_vinifera_cultivar_PN40024_chromosome_19,_12X,_whole_genome_shotgun_sequence:18872714-18872817	104	24936	48.484	23798	0.027	-	GUUGGAAGUCGGUGGGGGACC	21090	0.008	21	Y	-1	239	2	1129	23249	262	13	42	24936	36	259	389	33	1	113	1094	178	45	32	28	98	0	0	0	0	6	11	9	27
22791	Cluster_30723	163.048	0.992842	0.335274	2.96129	0.00306358	0.00339931	vvi-MIR3640	NC_012022.3_Vitis_vinifera_cultivar_PN40024_chromosome_16,_12X,_whole_genome_shotgun_sequence:11986630-11987485	856	26577	51.675	26472	0.98	+	GAAAAGGCAUCAUCAAUCAGGUAA	4712	0.048	24	N5	-1	132	3306	283	479	522	1818	20037	26577	337	218	156	25	81	148	183	178	444	178	97	63	196	169	21	17	217	228	152	47
33656	Cluster_40603	2.22349	1.7615	0.619142	2.84507	0.00444017	0.0049952	novel-vvi-MIR477f*	NW_003724240.1_Vitis_vinifera_cultivar_PN40024_unplaced_genomic_scaffold,_12X_scaffold_240.assembly12x,_whole_genome_shotgun_sequence:155262-155680	419	6535	12.706	2	0.002	-	GUUGGAAGCCGGUGGGGGACC	5427	0.019	21	N15	-1	37	3	582	5749	28	13	123	6535	4	20	8	0	0	3	14	8	6	2	2	0	0	0	0	0	0	1	1	2
3610	Cluster_13281	54.2195	1.23646	0.438085	2.82243	0.00476614	0.00543743	vvi-MIR2950	NC_012013.3_Vitis_vinifera_cultivar_PN40024_chromosome_7,_12X,_whole_genome_shotgun_sequence:14340192-14340976	785	82167	159.762	81941	0.995	+	UGGUGUGCACGGGAUGGAAUA	42358	0.005	21	N5	-1	387	42	1495	78056	680	243	1264	82167	73	48	31	5	24	110	216	53	39	14	18	114	28	108	20	15	36	40	16	141
6922	Cluster_16291	243.567	0.99216	0.353104	2.80983	0.00495684	0.00573578	Pant1200_majsp_D3plus	NC_012015.3_Vitis_vinifera_cultivar_PN40024_chromosome_9,_12X,_whole_genome_shotgun_sequence:1161752-1163111	1360	169385	329.345	169010	0.83	+	ACAAGAGGCUGCUCCAAACUU	41796	0.026	21	N5	1260.5	1497	1166	3916	142229	10085	3182	7310	169385	329	565	156	21	116	424	316	101	1126	82	36	88	320	472	44	9	334	306	88	157
1676	Cluster_11519	4.26456	1.56352	0.558053	2.80173	0.00508287	0.00596685	vvi-MIR398b	NC_012012.3_Vitis_vinifera_cultivar_PN40024_chromosome_6,_12X,_whole_genome_shotgun_sequence:16503503-16503672	170	328943	639.582	97	0.979	+	CAGGGGCGACCUGAGAACACA	309297	0.001	21	N15	-1	1641	66	2379	324425	329	75	28	328943	5	4	3	7	4	6	35	1	2	0	2	3	0	9	4	3	2	0	1	1
2829	Cluster_12569	2049.26	-0.808182	0.300003	-2.69391	0.00706188	0.00841194	vvi-MIR403f	NC_012013.3_Vitis_vinifera_cultivar_PN40024_chromosome_7,_12X,_whole_genome_shotgun_sequence:4179528-4179828	301	130547	253.83	1567	0.186	-	UUAGAUUCACGCACAAACUCG	74110	0.003	21	Y	-1	1985	32	6821	101206	19489	958	56	130547	536	1751	12221	1015	186	679	2274	2816	1462	2669	6020	6181	2777	10924	1586	1530	398	1268	4632	2468
30816	Cluster_38021	26.406	1.65624	0.617954	2.6802	0.00735777	0.00889522	novel-vvi-MIR477d*-like	NC_012025.3_Vitis_vinifera_cultivar_PN40024_chromosome_19,_12X,_whole_genome_shotgun_sequence:18881276-18881422	147	70461	137.001	11	0.002	-	GUUGGAAGCCGGUGGGGGACC	59695	0.004	21	N15	-1	302	21	6010	63121	360	79	568	70461	22	248	114	16	0	40	168	79	40	12	10	34	0	1	0	0	1	28	7	29
38343	Cluster_7870	594.945	-0.781086	0.297831	-2.62258	0.00872666	0.01071	vvi-MIR403d	NC_012011.3_Vitis_vinifera_cultivar_PN40024_chromosome_5,_12X,_whole_genome_shotgun_sequence:166367-166623	257	38401	74.665	470	0.837	+	UUAGAUUCACGCACAAACUCG	22479	0.008	21	Y	-1	583	32	1698	30286	5660	93	49	38401	169	516	3550	293	45	209	654	806	407	773	1739	1762	735	3254	496	443	130	407	1286	603
19272	Cluster_27520	127.493	0.817416	0.315825	2.58819	0.00964804	0.0120229	vvi-MIR3632	NC_012020.3_Vitis_vinifera_cultivar_PN40024_chromosome_14,_12X,_whole_genome_shotgun_sequence:23394265-23396214	1950	18938	36.822	11351	0.901	+	UUUCCCAGACCCCCAAUACCAA	4887	0.086	24	N5	-1	124	598	414	1447	6152	1197	9006	18938	233	207	227	74	61	213	198	111	485	75	108	134	102	365	31	32	90	100	24	103
26392	Cluster_33996_P98	17.356	1.42628	0.555272	2.56862	0.0102104	0.0129225	vvi-MIR169c-5'phase	NC_012010.3_Vitis_vinifera_cultivar_PN40024_chromosome_4,_12X,_whole_genome_shotgun_sequence:2265831-2266085	255	14812	28.8	10957	0.004	-	UGUAGGGAGUAGAAUGCAGC	7253	0.015	20	N0	-1	103	24	7588	6870	78	115	34	14812	20	12	0	1	10	9	28	20	37	2	0	9	10	1	1	0	55	21	0	50
38316	Cluster_7846	207.307	-0.784228	0.305848	-2.56412	0.0103439	0.0132993	vvi-MIR403a	NC_012011.3_Vitis_vinifera_cultivar_PN40024_chromosome_5,_12X,_whole_genome_shotgun_sequence:65250-65645	396	13357	25.971	165	0.833	+	UUAGAUUCACGCACAAACUCG	7764	0.014	21	N12	-1	174	17	620	10410	2027	89	20	13357	41	152	1256	108	23	90	216	277	151	264	617	653	255	1130	161	148	42	120	454	245
15253	Cluster_2386	8.89715	1.50036	0.597341	2.51173	0.0120142	0.015696	vvi-MIR477b	NC_012008.3_Vitis_vinifera_cultivar_PN40024_chromosome_2,_12X,_whole_genome_shotgun_sequence:1237520-1237866	347	10610	20.63	10602	0.995	+	GAAGCUCUUGAGGGGGACUG	5226	0.021	20	Y	-1	379	10	5516	4273	349	54	29	10610	47	9	7	1	0	3	22	5	3	15	1	18	0	1	0	0	8	3	9	22
23813	Cluster_31652	77.3063	1.38484	0.55289	2.50474	0.0122543	0.016272	vvi-MIR479	NC_012022.3_Vitis_vinifera_cultivar_PN40024_chromosome_16,_12X,_whole_genome_shotgun_sequence:21573750-21573982	233	161429	313.875	161397	0.999	+	UGUGGUAUUGGUUCGGCUCAUC	131476	0.002	22	Y	-1	282	94	1995	20097	135958	2333	670	161429	167	39	6	0	68	106	138	40	76	9	7	47	50	89	1	6	135	49	143	106
2537	Cluster_12304	62.2423	1.16425	0.496541	2.34472	0.0190412	0.0257056	novel-1; 24 nt species	NC_012013.3_Vitis_vinifera_cultivar_PN40024_chromosome_7,_12X,_whole_genome_shotgun_sequence:2558365-2558622	258	2102	4.087	695	0.961	+	UUUGACUGUGAUUUUAGGAAGCCU	1329	0.037	24	Y	-1	1	12	1	4	9	83	1992	2102	87	168	67	20	35	103	239	56	78	66	59	88	11	75	13	4	20	124	0	30
8669	Cluster_17879	345.632	0.803495	0.34288	2.34337	0.0191105	0.0262365	vvi-MIR3639-5p	NC_012015.3_Vitis_vinifera_cultivar_PN40024_chromosome_9,_12X,_whole_genome_shotgun_sequence:21823002-21823312	311	26926	52.354	9578	0.858	+	UUGACUUCUGAAAAGCUAAAAGCU	8621	0.02	24	N14	-1	49	1181	70	247	181	877	24321	26926	251	677	1247	377	84	518	1078	470	473	779	1060	463	119	722	100	68	141	311	154	142
38344	Cluster_7871	179.609	-0.73709	0.314814	-2.34135	0.019214	0.0268333	vvi-MIR403e	NC_012011.3_Vitis_vinifera_cultivar_PN40024_chromosome_5,_12X,_whole_genome_shotgun_sequence:168068-168285	218	11691	22.731	144	0.837	+	UUAGAUUCACGCACAAACUCG	6894	0.014	21	Y	-1	153	14	549	9177	1732	58	8	11691	41	166	1110	83	17	78	199	252	135	237	560	536	231	975	113	123	34	122	379	177
17347	Cluster_25767	23.9879	1.00041	0.427589	2.33964	0.0193022	0.0274294	novel-2	NC_012020.3_Vitis_vinifera_cultivar_PN40024_chromosome_14,_12X,_whole_genome_shotgun_sequence:1404121-1404335	215	2508	4.876	2347	0.92	+	AAACCGAGAUCGUCCAUUGAUUGG	1080	0.038	24	N15	-1	14	3	32	856	24	72	1507	2508	9	29	86	19	8	22	59	47	17	11	31	32	0	65	13	0	11	8	70	36
30800	Cluster_38007	12.4472	1.3185	0.566231	2.32856	0.0198824	0.0287585	novel_vvi-477d	NC_012025.3_Vitis_vinifera_cultivar_PN40024_chromosome_19,_12X,_whole_genome_shotgun_sequence:18678360-18678432	73	45981	89.403	42140	0.999	+	GUUGGAAGUCGGUGGGGGAAC	26508	0.007	21	Y	-1	467	8	3173	31870	10272	48	143	45981	5	28	134	14	2	11	108	13	9	14	19	44	0	0	0	0	0	1	7	2
19048	Cluster_27316	20186.3	0.933047	0.407184	2.29146	0.0219367	0.0323068	TAS4a_majspD1plus	NC_012020.3_Vitis_vinifera_cultivar_PN40024_chromosome_14,_12X,_whole_genome_shotgun_sequence:21607803-21608825	1023	4870382	9469.75	4853665	0.536	.	UUGAGCAAGAAAUUAUAAGCA	1419247	0.002	21	N5	18630.8	18367	5734	58590	4616375	138530	14141	18645	4870382	26982	28049	4748	1128	11373	38851	21341	2858	59094	7401	4021	4461	4816	29398	1594	1056	27979	24211	3283	2606
27593	Cluster_35083	12.5568	-0.976512	0.442417	-2.20722	0.0272984	0.0409476	novel_aly-MIR3435-like	NC_012024.3_Vitis_vinifera_cultivar_PN40024_chromosome_18,_12X,_whole_genome_shotgun_sequence:13887167-13887325	159	1028	1.999	1028	0.981	+	CGUGAGCUCUAACAUCGGUGA	177	0.085	21	Y	-1	160	28	61	728	41	5	5	1028	0	9	11	5	0	5	40	32	5	7	14	76	2	24	68	24	1	1	12	33
38418	Cluster_7938	30.2311	-0.765356	0.352497	-2.17124	0.029913	0.0457161	vvi-MIR403c	NC_012011.3_Vitis_vinifera_cultivar_PN40024_chromosome_5,_12X,_whole_genome_shotgun_sequence:602544-603058	515	1955	3.801	42	0.834	+	UUAGAUUCACGCACAAACUCG	1075	0.055	21	N12	-1	33	57	82	1463	299	17	4	1955	7	23	165	19	4	13	27	37	13	43	100	89	44	179	21	22	11	23	58	32
13819	Cluster_22557	19.8205	0.741436	0.344076	2.15486	0.0311724	0.048557	phasitrigger.VIT_12s0034g01350coding.LRR,23paralogues	NC_012018.3_Vitis_vinifera_cultivar_PN40024_chromosome_12,_12X,_whole_genome_shotgun_sequence:17339376-17340418	1043	3916	7.614	758	0.653	.	UAAGGAAUUAAACAAAGAUGA	236	0.289	21	N5	24	76	40	111	2879	605	68	137	3916	20	29	38	7	10	26	56	45	25	9	21	44	10	47	12	13	8	22	12	23
15360	Cluster_23959	5.72094	1.19869	0.564924	2.12186	0.0338497	0.0537613	vvi-MIR172b	NC_012019.3_Vitis_vinifera_cultivar_PN40024_chromosome_13,_12X,_whole_genome_shotgun_sequence:6181298-6181485	188	18915	36.777	228	0.002	-	AGAAUCUUGAUGAUGCUGCAU	16025	0.011	21	Y	-1	52	13	268	18369	149	49	15	18915	4	28	11	0	1	17	2	8	28	1	1	0	6	6	0	0	4	7	9	0
18092	Cluster_26443	155.596	0.611256	0.290327	2.10541	0.0352559	0.0571145	TAS-cand_miR7122trigger.VIT_14s0081g00100~300ntdownstreamofgrapeESTencoding57aapeptide	NC_012020.3_Vitis_vinifera_cultivar_PN40024_chromosome_14,_12X,_whole_genome_shotgun_sequence:7642853-7644706	1854	316689	615.756	303847	0.263	.	ACAAGUGGAAUUCCAGAGGAA	138338	0.021	21	N5	5365.9	1332	670	3315	284821	17331	2445	6775	316689	159	329	225	41	56	196	363	197	360	163	133	187	70	443	85	35	132	174	105	185
26333	Cluster_33943	56.6119	0.623922	0.299236	2.08505	0.0370652	0.061271	vvi-MIR394c	NC_012024.3_Vitis_vinifera_cultivar_PN40024_chromosome_18,_12X,_whole_genome_shotgun_sequence:3551163-3551374	212	6572	12.778	3363	0.073	-	UUGGCAUUCUGUCCACCUCC	2483	0.039	20	N14	-1	100	12	2946	2805	192	164	353	6572	59	82	113	13	27	41	53	90	93	80	23	23	61	139	18	26	157	30	58	30
23098	Cluster_31005	1.6277	1.32299	0.635284	2.08252	0.0372951	0.0629355	vvi-MIR399b	NC_012022.3_Vitis_vinifera_cultivar_PN40024_chromosome_16,_12X,_whole_genome_shotgun_sequence:15618712-15618820	109	900	1.75	171	0.01	-	UGCCAAAGGAGAGUUGCCCUG	597	0.047	21	Y	-1	14	2	54	819	8	1	2	900	0	17	6	1	0	0	11	5	0	0	0	3	0	7	0	0	0	1	0	1
37570	Cluster_717	2.80209	1.27394	0.615396	2.07011	0.0384421	0.0662513	vvi-MIR395l	NC_012007.3_Vitis_vinifera_cultivar_PN40024_chromosome_1,_12X,_whole_genome_shotgun_sequence:6559057-6559212	156	520	1.011	11	0.96	+	CUGAAGUGUUUGGGGGAACUC	185	0.106	21	Y	-1	1	1	35	426	36	19	2	520	10	14	0	0	2	8	2	0	4	0	0	2	4	4	0	0	3	1	0	2
10750	Cluster_19769	831.381	1.07871	0.527272	2.04582	0.0407737	0.0717972	vvi-MIR319e	NC_012017.3_Vitis_vinifera_cultivar_PN40024_chromosome_11,_12X,_whole_genome_shotgun_sequence:4317150-4317499	350	27054	52.603	26450	0.999	+	UUUGGACUGAAGGGAGCUCCU	21844	0.01	21	N15	-1	1083	92	1148	23674	985	21	51	27054	352	929	615	256	73	3405	7697	1643	616	259	587	2027	22	2087	838	357	39	256	80	1489
37505	Cluster_711	2.06306	1.25056	0.615124	2.03302	0.0420504	0.0756907	vvi-MIR395b	NC_012007.3_Vitis_vinifera_cultivar_PN40024_chromosome_1,_12X,_whole_genome_shotgun_sequence:6502518-6502791	274	834	1.622	28	0.953	+	CUGAAGUGUUUGGGGGAACUC	402	0.07	21	Y	-1	6	3	37	675	50	53	10	834	4	11	0	0	0	2	2	7	3	0	1	2	1	1	0	0	1	2	0	2
40675	Cluster_9997	1058.54	0.742955	0.369509	2.01065	0.044362	0.0816664	nta-MIR827	NC_012011.3_Vitis_vinifera_cultivar_PN40024_chromosome_5,_12X,_whole_genome_shotgun_sequence:24742087-24742287	201	183405	356.604	182953	0.011	-	UUAGAUGAUCAUCAACAAACA	115492	0.002	21	Y	-1	83	474	3375	167107	11008	1213	145	183405	502	8907	2953	237	244	551	1032	977	2392	1084	392	689	3551	1908	116	177	1617	650	816	576
21332	Cluster_294	9920.84	-1.18379	0.599138	-1.97581	0.0481758	0.0907498	TAS4c_2ntmmD4minus_perTIPS	NC_012007.3_Vitis_vinifera_cultivar_PN40024_chromosome_1,_12X,_whole_genome_shotgun_sequence:2960325-2961696	1372	372228	723.743	366657	0.858	+	UGAAGGUCCAAGGUUGAGGCU	114868	0.011	21	N5	3375.4	4752	1139	22482	308488	19863	3366	12138	372228	25	205	25900	7557	101	387	38930	14641	42	20846	32408	66934	6	51806	31128	22777	46	48	3000	14686
1607	Cluster_11457	9.61723	1.04525	0.531187	1.96775	0.0490964	0.0946859	vvi-MIR398c	NC_012012.3_Vitis_vinifera_cultivar_PN40024_chromosome_6,_12X,_whole_genome_shotgun_sequence:15575502-15575794	293	911701	1772.67	270	0.021	-	CAGGGGCGACCUGAGAACACA	857341	0.001	21	N15	-1	4468	77	6518	899407	928	215	88	911701	7	5	11	1	13	8	78	16	7	0	7	24	1	11	9	6	9	3	2	7
30059	Cluster_37330	2.01778	1.21163	0.625424	1.9373	0.0527091	0.104133	cs-MIR1515-like_bra-158-3p/gra-8744-like	NC_012025.3_Vitis_vinifera_cultivar_PN40024_chromosome_19,_12X,_whole_genome_shotgun_sequence:7113014-7113099	86	273	0.531	270	0.941	+	UUCCAAAAGUAGGAAAAGUACUUG	110	0.136	24	Y	-1	2	6	0	20	8	12	225	273	3	6	15	0	0	5	5	0	5	0	2	0	0	3	0	0	4	4	0	2
38417	Cluster_7937	23.0616	-0.737259	0.386874	-1.90568	0.0566912	0.117743	vvi-MIR403b	NC_012011.3_Vitis_vinifera_cultivar_PN40024_chromosome_5,_12X,_whole_genome_shotgun_sequence:600189-600269	81	1527	2.969	19	0.832	+	UUAGAUUCACGCACAAACUCG	857	0.047	21	Y	-1	24	0	66	1193	241	1	2	1527	9	17	145	16	1	7	28	27	10	35	71	69	27	136	19	22	1	19	52	25
14791	Cluster_2344	186.13	0.84679	0.447359	1.89287	0.0583755	0.124432	vvi-MIR319c	NC_012008.3_Vitis_vinifera_cultivar_PN40024_chromosome_2,_12X,_whole_genome_shotgun_sequence:855544-855757	214	48131	93.584	12089	0.059	-	UUGGACUGAAGGGAGCUCCC	13421	0.015	21	Y	-1	491	19	18948	21220	5761	1548	144	48131	134	207	100	34	123	363	1120	230	319	52	80	383	50	437	165	176	107	56	34	435
39179	Cluster_8634	6.89167	0.399242	0.567318	0.703737	0.481597	NA	vvi-miR7122	NC_012011.3_Vitis_vinifera_cultivar_PN40024_chromosome_5,_12X,_whole_genome_shotgun_sequence:6820608-6821071	464	128645	250.132	128643	0.002	-	UUACACAGAGAGAUGACGGUGG	109107	0.003	22	Y	-1	498	17	259	4400	122593	832	46	128645	12	17	5	0	5	7	6	9	25	0	3	0	0	41	0	10	4	4	3	1
23825	Cluster_31664	1.19026	0.592043	0.637231	0.929087	0.352844	NA	vvi-MIR828a_star_sequenced	NC_012022.3_Vitis_vinifera_cultivar_PN40024_chromosome_16,_12X,_whole_genome_shotgun_sequence:21724236-21724615	380	1336	2.598	1330	0.96	+	AGAUGCUCAUUUGAGGAAGCAA	411	0.082	22	N14	-1	7	37	395	389	454	27	27	1336	3	13	2	0	0	0	1	0	0	3	0	2	1	1	0	0	3	0	1	0
38381	Cluster_7904	241.331	1.46868	0.443285	3.31316	0.000922483	0.0882427	TAS3 per blasting aligned seq with Arabidopsis cDNAs. VIT_05s0077g00540 with Allen score 0 and degradome category 0; encodes unknown; NCBI best BLASTP E=.36 Indole-3-acetate beta glucosyltransferase OLP82245.1. D7(+) cascades to ARF4 VIT_06s0004g03130, Allen 2.5 degradome 4 p =0.07; encodes VIT_05s0077g00540 Allen =0, degrad = 2, p=0.006.	NC_012011.3_Vitis_vinifera_cultivar_PN40024_chromosome_5,_12X,_whole_genome_shotgun_sequence:358508-360140	1633	674692	1311.84	532637	0.492	.	UGAGUUGGGCGGAAACGGGGA	127496	0.015	21	N5	3172.2	5193	905	14148	595006	43631	8375	7434	674692	230	1734	515	819	385	171	40	10	208	272	323	67	417	32	26	70	107	251	22	0
39033	Cluster_8523	27.9831	1.47739	0.436275	3.38637	0.000708236	0.0793512	~5 kb 5' of VIT_05s0020g04290 encoding 81aa peptide with N-term signal	NC_012011.3_Vitis_vinifera_cultivar_PN40024_chromosome_5,_12X,_whole_genome_shotgun_sequence:6017171-6018107	937	48650	94.593	4181	0.743	.	AGGAGUUCAAUAGCAGCAAGA	28588	0.028	21	N5	504.6	371	797	1388	42596	2419	375	704	48650	16	41	77	6	16	49	153	84	47	6	13	14	46	45	11	0	16	15	0	18
Table S3c summary. Differential expression of miRNAs in berries subjected to high versus low fluence UV-B radiation. C: Conserved miRNA; NC: Non-conserved miRNA; N: Novel miRNA
miRNA	log2FC	P value*	Validated Targets	Species in which targets are predicted	C/NC/N	Phasi Locus	Phase Score	Reference
vvi-MIR3627	2.02	5e-06	calcium-transporting ATPase10	Grapevine peach, apple	C		121.3	Wang et al., 2011; Xia et al., 2013
							for MIRNA=63
vvi-MIR399i	2.1	0.0001	Major Facilitator PHT1_3/PHO84; inorganic phosphate transporter	many	C			Mica et al., 2010
vvi-MIR535c	-1.19	0.0007	DNA primase large SU; SPLs (bulge at nt6 seed region)	many	C			Pantaleo et al., 2010
								Paim-Pinto et al., 2016
vvi-MIR167c	1.37	0.001	ARF6, ARF8, ARF6-Like; predicted bulge target nt10	many	C			Paim-Pinto et al., 2016; Wang et al., 2013
vvi-MIR403f	-0.81	0.008	AGO2	dicots	C		2.4	Pantaleo et al., 2010
vvi-MIR403d	-0.78	0.01	AGO2	dicots	C			Pantaleo et al., 2010
vvi-MIR3632-3p; 22 nt species	0.82	0.01	six NB-ARC disease resistance LRRs rga4-like					Pantaleo et al., 2016
								Sun et al. 2015
								Fan et al. 2015
				Grapevine	NC
								Paim-Pinto et al., 2016
vvi-MIR169c-5p isoMIR	1.43	0.013	Five Nuclear transcription factor Y subunit A- related; JAZ3_1/VvJAZI_TIFY transcription corepressor; Zinc finger At1g75340-like					Gyula et al., 2018 Paim-Pinto et al., 2016
				many	C
vvi-MIR403a	-0.78	0.013	AGO2	dicots	C			Pantaleo et al., 2010
vvi-MIR477b	1.5	0.016	See Table 3;
				dicots	C			Paim-Pinto et al., 2016
novel-1; 24 nt species	1.16	0.026	None predicted		N			This report
vvi-MIR403e	-0.74	0.027	AGO2	dicots	C			Pantaleo et al., 2010
novel-2; 24 nt species	1	0.03	None predicted		N			This report
novel_aly-MIR3435-hp-like	-0.98	0.04	None predicted		N			This report
vvi-MIR403c	-0.77	0.046	AGO2	dicots	C			Pantaleo et al., 2010
vvi-MIR172b	1.2	0.05	Four APETALA2-like TFs	many	C			Pantaleo et al., 2010
vvi-MIR828 targeted TAS4a	0.41	0.03	MYBA6/MYBA7	eudicots	C	NC_012020.3_chr14:21607803-21608825	18631	Rock, 2013
TAS4c	-1.18	0.09		eudicots	C	NC_012007.3_chr1:2960325-2961696	3375.4	Rock, 2013
vvi-MIR7122; 22 nt species	0.61$	0.06	None predicted	dicots	C		5366	Xia et al., 2013
vvi-MIR828 MYB target	0.99$	0.006	MYB	Gymnosperms, eudicots	C	NC_012015.3_chr9:1161752-1163111; VIT_09s0002g01380	1260.5	Pantaleo et al., 2010; Luo et al., 2012
vvi-MIR482	0.74$	0.03	NB-LRR	grapevine	N	vvi-sly-TAS5-like NC_012024.3_chr18: 20665102-20666018 D6(+) à VIT_12s0034g01350	398.3	This report Li et al., 2012; Xia et al., 2013
LRR target
TAS3, miR390 target	1.47	0.075	D7(+): ARF2,3,4	many	C	NC_012011.3_chr5: 358508-360140	3172.2	Xia et al., 2013; Zhang et al., 2012
			D2(-):3' UTR of TOPOISOMERASE II-ASSOCIATED PROTEIN
			D5(-):3' UTR of Zinc finger RING/FYVE/PHD
Unknown trigger	1.47	0.08				NC_012011.3_chr5: 6017171-6018107	504.6	This report
*Bonferroni-Hochberg Family-wise False Discovery Rate-adjusted (α=0.1) , based on all 189 MIRNA loci tested, minus those (108) loci that were independently filtered out by DESeq2 due to low counts cutoff (<7.8 base mean reads per library).
$ LFC and P values for target LLR and MYB phasi-RNAs; degradome validated (Supplementary Table 4, File S5).
[truncated: 38 more columns]

## Sheet: S3d
Supplementary Table S3d. DESeq2 output and associated ShortStack raw Counts dataset parameters summarized for target functions, sRNA change direction, and target change correlations below, and normalized reads per 20M for visualization of developmental time effects.
																														raw ShortStack counts
																													berry devt stage	minus3	veraison	plus3	plus6	minus3	veraison	plus3	plus6	minus3	veraison	plus3	plus6	minus3	veraison	plus3	plus6	minus3	veraison	plus3	plus6
																													UV fluence	High	High	High	High	High	High	High	High	Low	Low	Low	Low	Low	Low	Low	Low	Field	Field	Field	Field
							Independent Filtering tested 34,074 loci filtered for low base mean counts <0.2 per library																						UV?	no UV	no UV	no UV	no UV	plus UV	plus UV	plus UV	plus UV	no UV	no UV	no UV	no UV	plus UV	plus UV	plus UV	plus UV	no UV	no UV	no UV	no UV
																													total clean counts	1774867	6951342	6310050	2621588	1332615	2719800	5540540	5319529	5150409	5825441	5576963	6494095	4096788	10736084	3991024	4308456	3372149	3983814	3870446	8396218
filerow	Name	baseMean	log2FoldChange	lfcSE	stat	pvalue	padj	annot	Locus	Length	Reads	RPM	UniqueReads	FracTop	Strand	MajorRNA	MajorRNAReads	Complexity	DicerCall	MIRNA	PhaseScore	Short	Long	X20	X21	X22	X23	X24	main reads	span5_cat_cleancomplete	9_TAGCTT-trim-TEsrt25S	13_GTGAAA-trim-TEsrt25S	17_GTCCGC-trim-TEsrt25S	7_ACTTGA-trim-TEsrt25S	11_GGCTAC-trim-TEsrt25S	15_GTGGCC-trim-TEsrt25S	19_CGTACG-trim-TEsrt25S	21_ATCACG-trim-TEsrt25S	25_TGACCA-trim-TEsrt25S	29_AGTCAA-trim-TEsrt25S	33_GAGTGG-trim-TEsrt25S	23_TTAGGC-trim-TEsrt25S	27_ACAGTG-trim-TEsrt25S	31_AGTTCC-trim-TEsrt25S	35_GGTAGC-trim-TEsrt25S	37_CCGTCC-trim-TEsrt25S	41_GCCAAT-trim-TEsrt25S	45_ATGTCA-trim-TEsrt25S	588_AGTCAA_span49-trim18-TEsrt25S
28659	Cluster_36061	4797.55	-1.39119	0.443534	92.6968	5.77e-20	1.36e-16	5'UTR_VIT_18s0089g00510_66aapeptide.phasetank_phasiscore-notSS98	NC_012024.3_Vitis_vinifera_cultivar_PN40024_chromosome_18,_12X,_whole_genome_shotgun_sequence:28294527-28296187	1661	339887	660.861	336476	0.912	+	CCUUCGGCCGAGAUCAUCAACU	171597	0.012	22	N5	35.112	2652	1382	3944	99195	217414	8362	6938	339887	3315	6780	3351	367	883	6189	2954	1518	46368	3201	2699	1860	8980	15370	913	508	6093	2922	1273	411
25263	Cluster_32969	143.764	-1.61991	0.423452	79.2745	4.39e-17	5.16e-14	Pant5440_majsp_3'D4minus	NC_012023.3_Vitis_vinifera_cultivar_PN40024_chromosome_17,_12X,_whole_genome_shotgun_sequence:9703075-9703885	811	147845	287.463	147343	0.661	.	GGUUUGAUGGCAUACUGUGAG	18926	0.03	21	N5	1329.9	1207	544	3648	119615	8845	2226	11760	147845	257	183	98	10	42	102	88	35	1063	74	51	60	110	402	46	15	255	133	72	96
19048	Cluster_27316	20186.3	-0.771904	0.581109	66.0308	3.02e-14	1.41e-11	TAS4a_majspD1plus	NC_012020.3_Vitis_vinifera_cultivar_PN40024_chromosome_14,_12X,_whole_genome_shotgun_sequence:21607803-21608825	1023	4870382	9469.75	4853665	0.536	.	UUGAGCAAGAAAUUAUAAGCA	1419247	0.002	21	N5	18630.8	18367	5734	58590	4616375	138530	14141	18645	4870382	26982	28049	4748	1128	11373	38851	21341	2858	59094	7401	4021	4461	4816	29398	1594	1056	27979	24211	3283	2606
5240	Cluster_14761	32.1298	-1.87268	0.738867	62.4071	1.8e-13	6.88e-11	vvi-MIR164c	NC_012014.3_Vitis_vinifera_cultivar_PN40024_chromosome_8,_12X,_whole_genome_shotgun_sequence:10080343-10080500	158	397666	773.204	3727	1	+	UGGAGAAGCAGGGCACGUGCA	347507	0.001	21	N15	-1	425	13	3562	388495	4485	659	27	397666	31	71	6	0	3	33	11	9	270	7	0	0	73	40	0	1	60	12	0	0
19786	Cluster_27992	107.139	-1.25621	0.448389	60.0232	5.81e-13	1.96e-10	Pant5669_majspD1plus_MYB156	NC_012020.3_Vitis_vinifera_cultivar_PN40024_chromosome_14,_12X,_whole_genome_shotgun_sequence:27707780-27708673	894	207907	404.245	206981	0.15	-	UUGAGCAAAAAGCUGGGCAUC	136057	0.014	21	N5	2232.7	2652	866	1625	186281	5302	901	10280	207907	74	291	166	12	25	104	96	52	610	52	25	47	227	287	7	20	210	87	60	32
5241	Cluster_14762	14.2487	-1.87016	0.67939	53.7093	1.29e-11	2.86e-09	vvi-MIR164c.2*	NC_012014.3_Vitis_vinifera_cultivar_PN40024_chromosome_8,_12X,_whole_genome_shotgun_sequence:10080582-10080626	45	1098	2.135	1097	0.951	+	CAUGUGCCCCUCUUCCCCAUC	804	0.031	21	N15	-1	2	0	20	873	158	16	29	1098	14	15	4	2	2	7	4	2	66	0	1	3	24	29	0	0	56	17	7	0
6922	Cluster_16291	243.567	-0.966355	0.496815	52.675	2.15e-11	4.39e-09	Pant1200_majsp_D3plus	NC_012015.3_Vitis_vinifera_cultivar_PN40024_chromosome_9,_12X,_whole_genome_shotgun_sequence:1161752-1163111	1360	169385	329.345	169010	0.83	+	ACAAGAGGCUGCUCCAAACUU	41796	0.026	21	N5	1260.5	1497	1166	3916	142229	10085	3182	7310	169385	329	565	156	21	116	424	316	101	1126	82	36	88	320	472	44	9	334	306	88	157
32154	Cluster_39236	22.046	-1.79193	0.632466	40.9829	6.59e-09	5.1e-07	vvi-MIR167c	NW_003724203.1_Vitis_vinifera_cultivar_PN40024_unplaced_genomic_scaffold,_12X_scaffold_179.assembly12x,_whole_genome_shotgun_sequence:260012-260098	87	169089	328.769	152535	0.996	+	UGAAGCUGCCAGCAUGAUCUC	122086	0.002	21	Y	-1	1899	38	5426	135684	25371	281	390	169089	36	44	8	0	19	19	23	21	69	5	1	3	16	45	4	0	44	11	12	5
7747	Cluster_17040	51.8637	-0.311601	0.470363	38.8986	1.82e-08	1.14e-06	vvi-MIR396a	NC_012015.3_Vitis_vinifera_cultivar_PN40024_chromosome_9,_12X,_whole_genome_shotgun_sequence:7372499-7372681	183	12570	24.441	11072	0.035	-	UUCCACAGCUUUCUUGAACUA	5321	0.033	21	Y	-1	301	56	1770	8861	709	137	736	12570	58	107	42	0	25	90	67	21	143	28	14	41	45	197	22	12	92	106	22	41
27593	Cluster_35083	12.5568	1.45234	0.803822	34.5781	1.5e-07	6.25e-06	novel_aly-MIR3435-like	NC_012024.3_Vitis_vinifera_cultivar_PN40024_chromosome_18,_12X,_whole_genome_shotgun_sequence:13887167-13887325	159	1028	1.999	1028	0.981	+	CGUGAGCUCUAACAUCGGUGA	177	0.085	21	Y	-1	160	28	61	728	41	5	5	1028	0	9	11	5	0	5	40	32	5	7	14	76	2	24	68	24	1	1	12	33
21332	Cluster_294	9920.84	5.93219	1.02866	32.9266	3.34e-07	1.2e-05	TAS4c_2ntmmD4minus_perTIPS	NC_012007.3_Vitis_vinifera_cultivar_PN40024_chromosome_1,_12X,_whole_genome_shotgun_sequence:2960325-2961696	1372	372228	723.743	366657	0.858	+	UGAAGGUCCAAGGUUGAGGCU	114868	0.011	21	N5	3375.4	4752	1139	22482	308488	19863	3366	12138	372228	25	205	25900	7557	101	387	38930	14641	42	20846	32408	66934	6	51806	31128	22777	46	48	3000	14686
22791	Cluster_30723	163.048	-0.997421	0.47982	31.5832	6.41e-07	2.04e-05	vvi-MIR3640	NC_012022.3_Vitis_vinifera_cultivar_PN40024_chromosome_16,_12X,_whole_genome_shotgun_sequence:11986630-11987485	856	26577	51.675	26472	0.98	+	GAAAAGGCAUCAUCAAUCAGGUAA	4712	0.048	24	N5	-1	132	3306	283	479	522	1818	20037	26577	337	218	156	25	81	148	183	178	444	178	97	63	196	169	21	17	217	228	152	47
31911	Cluster_39015	10.0577	-0.871851	0.540062	30.7197	9.74e-07	2.87e-05	Pant6823_majspD3minus	NW_003724301.1_Vitis_vinifera_cultivar_PN40024_unplaced_genomic_scaffold,_12X_scaffold_341.assembly12x,_whole_genome_shotgun_sequence:36614-37231	618	63619	123.698	63410	0.082	-	UCCACAGCAAAAGAGACUGCA	9399	0.034	21	N5	476.3	501	426	1560	48970	4814	847	6501	63619	8	39	19	2	3	8	2	3	53	3	10	4	13	25	4	0	18	12	12	0
4751	Cluster_14316	5680.36	-1.19574	0.479766	29.6289	1.65e-06	4.36e-05	vvi-MIR166a	NC_012014.3_Vitis_vinifera_cultivar_PN40024_chromosome_8,_12X,_whole_genome_shotgun_sequence:3302736-3303387	652	249557	485.227	6037	0.042	-	UCUCGGACCAGGCUUCAUUCC	228332	0.002	21	N5	-1	359	41	311	245687	2707	279	173	249557	10617	9042	2563	584	3973	5608	8945	2419	7276	3082	2118	7164	2632	14341	2566	2739	8036	5530	3744	4026
10863	Cluster_19871	383.764	-0.298519	0.410012	29.6167	1.66e-06	4.38e-05	vvi-MIR396b	NC_012017.3_Vitis_vinifera_cultivar_PN40024_chromosome_11,_12X,_whole_genome_shotgun_sequence:5246708-5246979	272	129583	251.955	112912	0.698	.	UUCCACAGCUUUCUUGAACUU	45988	0.007	21	N6	464.7	3064	145	21519	98496	4703	1385	271	129583	452	802	614	50	109	843	700	273	1365	276	128	382	443	1543	295	178	402	375	139	165
26333	Cluster_33943	56.6119	-1.17575	0.396642	29.6063	1.67e-06	4.38e-05	vvi-MIR394c	NC_012024.3_Vitis_vinifera_cultivar_PN40024_chromosome_18,_12X,_whole_genome_shotgun_sequence:3551163-3551374	212	6572	12.778	3363	0.073	-	UUGGCAUUCUGUCCACCUCC	2483	0.039	20	N14	-1	100	12	2946	2805	192	164	353	6572	59	82	113	13	27	41	53	90	93	80	23	23	61	139	18	26	157	30	58	30
31023	Cluster_3821	419.283	-0.965281	0.354671	26.443	7.7e-06	0.000146315	vvi-MIR168	NC_012008.3_Vitis_vinifera_cultivar_PN40024_chromosome_2,_12X,_whole_genome_shotgun_sequence:17944458-17944975	518	560810	1090.41	560794	0.019	-	UCGCUUGGUGCAGGUCGGGAA	486400	0.001	21	N13	-1	998	169	6154	537568	14483	1018	420	560810	506	660	522	132	97	331	599	477	1655	448	416	701	489	1022	258	221	517	227	188	193
32849	Cluster_39868	2.49554	-2.3908	1.10679	25.2759	1.35e-05	0.000229434	novel vvi-MIR159d-like	NW_003724364.1_Vitis_vinifera_cultivar_PN40024_unplaced_genomic_scaffold,_12X_scaffold_426.assembly12x,_whole_genome_shotgun_sequence:17203-17406	204	310	0.603	272	0.839	+	AGCUGCUGACUUAUGGAUCCCU	195	0.184	22	N11	-1	1	1	1	6	235	5	61	310	2	3	1	0	3	0	0	0	9	0	0	1	21	0	0	0	6	6	0	0
533	Cluster_10483	8.41306	-0.598303	0.793889	22.6247	4.84e-05	0.000623163	vvi-miR4376	NC_012012.3_Vitis_vinifera_cultivar_PN40024_chromosome_6,_12X,_whole_genome_shotgun_sequence:3976346-3976502	157	55613	108.131	55099	0.058	-	UCGCAGGAGAGAUGACGCCGU	27887	0.008	21	Y	-1	175	106	882	32318	20085	1689	358	55613	6	9	10	0	2	12	6	10	23	3	2	0	10	26	0	4	17	7	0	0
40675	Cluster_9997	1058.54	-0.316528	0.498261	22.2836	5.69e-05	0.000709981	nta-MIR827	NC_012011.3_Vitis_vinifera_cultivar_PN40024_chromosome_5,_12X,_whole_genome_shotgun_sequence:24742087-24742287	201	183405	356.604	182953	0.011	-	UUAGAUGAUCAUCAACAAACA	115492	0.002	21	Y	-1	83	474	3375	167107	11008	1213	145	183405	502	8907	2953	237	244	551	1032	977	2392	1084	392	689	3551	1908	116	177	1617	650	816	576
19272	Cluster_27520	127.493	-0.830515	0.450792	21.9924	6.55e-05	0.000794241	vvi-MIR3632	NC_012020.3_Vitis_vinifera_cultivar_PN40024_chromosome_14,_12X,_whole_genome_shotgun_sequence:23394265-23396214	1950	18938	36.822	11351	0.901	+	UUUCCCAGACCCCCAAUACCAA	4887	0.086	24	N5	-1	124	598	414	1447	6152	1197	9006	18938	233	207	227	74	61	213	198	111	485	75	108	134	102	365	31	32	90	100	24	103
1835	Cluster_11664	30.4768	2.57143	0.693642	21.908	6.82e-05	0.000819655	vvi-MIR530a-isomiR	NC_012012.3_Vitis_vinifera_cultivar_PN40024_chromosome_6,_12X,_whole_genome_shotgun_sequence:17896016-17896161	146	4348	8.454	313	1	+	UCUGCAUUUGCACCUGCACCU	3627	0.017	21	N15	-1	10	31	125	4031	109	42	0	4348	1	81	196	56	0	26	88	92	17	49	62	69	0	109	10	1	9	15	57	34
24484	Cluster_32261	1268.54	-0.125994	0.435363	21.3178	9.04e-05	0.00101871	vvi-MIR162	NC_012023.3_Vitis_vinifera_cultivar_PN40024_chromosome_17,_12X,_whole_genome_shotgun_sequence:4716209-4717020	812	211855	411.921	211412	0.69	.	UCGAUAAACCUCUGCAUCCAG	130678	0.002	21	N5	649.9	3461	107	5654	200462	1703	75	393	211855	1148	4870	5575	299	200	1011	1377	1345	5072	2878	1091	1022	3135	7365	429	361	641	823	841	372
13874	Cluster_22607	11120.2	-0.465397	0.384194	17.64	0.000521815	0.0039193	vvi-MIR166b	NC_012018.3_Vitis_vinifera_cultivar_PN40024_chromosome_12,_12X,_whole_genome_shotgun_sequence:17937205-17937706	502	2489005	4839.51	2259140	0.985	+	UCGGACCAGGCUUCAUUCCUC	2063551	0	21	Y	-1	129016	116	17636	2329152	11835	820	430	2489005	4488	35978	13032	1702	1941	9671	12936	18263	41432	6877	5617	13777	20668	46294	9681	9247	14413	10331	4879	8815
38343	Cluster_7870	594.945	0.717684	0.413676	17.4426	0.00057304	0.00421669	vvi-MIR403d	NC_012011.3_Vitis_vinifera_cultivar_PN40024_chromosome_5,_12X,_whole_genome_shotgun_sequence:166367-166623	257	38401	74.665	470	0.837	+	UUAGAUUCACGCACAAACUCG	22479	0.008	21	Y	-1	583	32	1698	30286	5660	93	49	38401	169	516	3550	293	45	209	654	806	407	773	1739	1762	735	3254	496	443	130	407	1286	603
11171	Cluster_20147	38.4865	-0.771779	0.513993	16.9542	0.000722244	0.00499938	vvi-MIR156d	NC_012017.3_Vitis_vinifera_cultivar_PN40024_chromosome_11,_12X,_whole_genome_shotgun_sequence:7623150-7623754	605	558190	1085.32	23553	0.011	-	UGACAGAAGAGAGUGAGCAC	452464	0.001	20	N5	-1	1005	1233	464430	66598	4409	20153	362	558190	36	48	20	1	19	62	57	52	164	18	5	40	56	177	15	16	43	22	34	28
23330	Cluster_31215	442.622	0.625145	0.424634	16.8967	0.000742171	0.00510516	vvi-MIR393a	NC_012022.3_Vitis_vinifera_cultivar_PN40024_chromosome_16,_12X,_whole_genome_shotgun_sequence:17247181-17247375	195	20241	39.356	1952	0.025	-	UCCAAAGGGAUCGCAUUGAUCU	7213	0.01	22	Y	-1	49	41	208	9178	10615	122	28	20241	104	679	1603	406	52	197	763	1535	488	801	692	1533	403	1743	407	643	55	63	452	629
38316	Cluster_7846	207.307	0.734369	0.424482	16.8532	0.0007576	0.00518721	vvi-MIR403a	NC_012011.3_Vitis_vinifera_cultivar_PN40024_chromosome_5,_12X,_whole_genome_shotgun_sequence:65250-65645	396	13357	25.971	165	0.833	+	UUAGAUUCACGCACAAACUCG	7764	0.014	21	N12	-1	174	17	620	10410	2027	89	20	13357	41	152	1256	108	23	90	216	277	151	264	617	653	255	1130	161	148	42	120	454	245
32538	Cluster_39587	1.96467	-0.60782	1.03759	16.7401	0.000799277	0.00540297	vvi-MIR3631b-like; can't verify as miRBase21 has no coordinates	NW_003724206.1_Vitis_vinifera_cultivar_PN40024_unplaced_genomic_scaffold,_12X_scaffold_184.assembly12x,_whole_genome_shotgun_sequence:75199-75990	792	302	0.587	147	0.778	.	UUCAGUUUAGUUAUGUUGGAUGAU	48	0.391	24	N5	0.2	1	9	2	8	2	17	263	302	2	12	1	0	2	1	0	1	2	0	0	0	7	0	0	0	4	4	0	0
2829	Cluster_12569	2049.26	0.614584	0.42015	15.9828	0.00114321	0.00703328	vvi-MIR403f	NC_012013.3_Vitis_vinifera_cultivar_PN40024_chromosome_7,_12X,_whole_genome_shotgun_sequence:4179528-4179828	301	130547	253.83	1567	0.186	-	UUAGAUUCACGCACAAACUCG	74110	0.003	21	Y	-1	1985	32	6821	101206	19489	958	56	130547	536	1751	12221	1015	186	679	2274	2816	1462	2669	6020	6181	2777	10924	1586	1530	398	1268	4632	2468
24848	Cluster_32593	28246.4	0.777108	0.388168	15.4741	0.00145323	0.00840205	vvi-MIR3630	NC_012023.3_Vitis_vinifera_cultivar_PN40024_chromosome_17,_12X,_whole_genome_shotgun_sequence:6896817-6898316	1500	877786	1706.73	877746	0.999	+	GAGAAUGAUGAUUUGUCUUUGGGAAUCUCUCUGAUG	632340	0.005	N	N2	-1	1267	869894	1765	1502	1220	1259	879	877786	6367	39065	73214	12098	4220	15050	25233	46703	15902	44281	68002	33446	28609	129094	16519	24078	11545	26095	93270	26464
18643	Cluster_26945	16.5537	-0.920609	0.611516	15.1965	0.0016562	0.00926739	MYBA7_majsp_D6plus	NC_012020.3_Vitis_vinifera_cultivar_PN40024_chromosome_14,_12X,_whole_genome_shotgun_sequence:16644828-16645711	884	1460	2.839	1131	0.625	.	UCAGAGGAUGGACUGAACUCA	143	0.246	21	N5	83	187	46	100	836	143	72	76	1460	11	38	14	0	2	19	17	5	65	8	1	20	62	28	15	6	19	25	1	38
5554	Cluster_15051	12.1725	-0.408007	0.709806	15.0747	0.00175392	0.00967398	vvi-MIR172d	NC_012014.3_Vitis_vinifera_cultivar_PN40024_chromosome_8,_12X,_whole_genome_shotgun_sequence:12666882-12667529	648	37034	72.007	485	0.997	+	AGAAUCUUGAUGAUGCUGCAU	32024	0.006	21	N5	-1	73	17	263	36015	543	101	22	37034	4	45	23	0	5	36	11	12	74	1	5	6	13	26	1	0	16	11	10	0
38344	Cluster_7871	179.609	0.693236	0.430192	14.6757	0.00211589	0.0110808	vvi-MIR403e	NC_012011.3_Vitis_vinifera_cultivar_PN40024_chromosome_5,_12X,_whole_genome_shotgun_sequence:168068-168285	218	11691	22.731	144	0.837	+	UUAGAUUCACGCACAAACUCG	6894	0.014	21	Y	-1	153	14	549	9177	1732	58	8	11691	41	166	1110	83	17	78	199	252	135	237	560	536	231	975	113	123	34	122	379	177
2510	Cluster_12280	1253.35	-0.183072	0.382445	14.6056	0.00218672	0.0113437	miR393_trigger.TIR1-like.VIT_07s0104g01320.allen0,degrad3,p=0.003	NC_012013.3_Vitis_vinifera_cultivar_PN40024_chromosome_7,_12X,_whole_genome_shotgun_sequence:2354212-2355484	1273	258564	502.74	257318	0.71	.	UCUCCUCAGGAAGAACUGCCC	35788	0.026	21	N5	5000.2	3549	2554	6834	229057	12062	1323	3185	258564	847	3309	1876	364	308	2298	2981	1862	4601	944	877	1578	1488	3407	683	524	981	1207	543	1219
12836	Cluster_21661	2.36496	-3.07532	0.950218	14.5357	0.00225963	0.0116159	vvi-MIR171c	NC_012018.3_Vitis_vinifera_cultivar_PN40024_chromosome_12,_12X,_whole_genome_shotgun_sequence:5487736-5487962	227	2609	5.073	1614	0.011	-	UGAUUGAGCCGUGCCAAUAUC	647	0.069	21	N14	-1	18	25	99	1617	59	49	742	2609	0	1	2	0	0	1	2	4	11	0	0	1	5	2	2	1	10	2	2	4
37570	Cluster_717	2.80209	-0.643712	1.01863	14.505	0.00229244	0.0117384	vvi-MIR395l	NC_012007.3_Vitis_vinifera_cultivar_PN40024_chromosome_1,_12X,_whole_genome_shotgun_sequence:6559057-6559212	156	520	1.011	11	0.96	+	CUGAAGUGUUUGGGGGAACUC	185	0.106	21	Y	-1	1	1	35	426	36	19	2	520	10	14	0	0	2	8	2	0	4	0	0	2	4	4	0	0	3	1	0	2
24600	Cluster_32367	8878.47	-0.500137	0.340155	14.0435	0.00284649	0.013716	vvi-MIR482	NC_012023.3_Vitis_vinifera_cultivar_PN40024_chromosome_17,_12X,_whole_genome_shotgun_sequence:5522830-5523995	1166	554104	1077.38	553644	0.947	+	UCUUUCCUACUCCUCCCAUUCC	269435	0.002	22	N5	-1	3587	784	15540	242526	287002	1079	3586	554104	7715	20113	10093	1856	1970	7594	10524	11057	29298	6932	4841	15650	9165	33005	9838	6479	9036	7808	7702	11691
1937	Cluster_11758	2.87689	-1.34071	0.862612	13.7401	0.00328121	0.0152647	novel-gra-MIR8761-like	NC_012012.3_Vitis_vinifera_cultivar_PN40024_chromosome_6,_12X,_whole_genome_shotgun_sequence:18688611-18689126	516	5227	10.163	5227	0.038	-	GGAAGGGGCAUGUGCUAUGCGUGU	2282	0.049	24	Y	-1	7	119	17	64	58	575	4387	5227	2	11	3	0	2	2	3	2	13	1	0	1	15	8	0	0	2	4	3	0
24631	Cluster_32396	12442.3	0.598266	0.468623	13.6464	0.00342813	0.0157398	vvi-MIR3634*	NC_012023.3_Vitis_vinifera_cultivar_PN40024_chromosome_17,_12X,_whole_genome_shotgun_sequence:5680697-5681863	1167	8998072	17495.4	8998057	0.618	.	ACGGCAUGAGUGCGAGUCGGAAA	5293448	0	23	N5	-1	19031	3480	6455	20176	111158	8811855	25917	8998072	8118	24306	22469	2784	2236	25899	22987	18227	32577	18978	13372	18803	5445	86969	8807	7379	6605	12098	5730	2485
38417	Cluster_7937	23.0616	1.08986	0.561776	13.528	0.00362334	0.0163952	vvi-MIR403b	NC_012011.3_Vitis_vinifera_cultivar_PN40024_chromosome_5,_12X,_whole_genome_shotgun_sequence:600189-600269	81	1527	2.969	19	0.832	+	UUAGAUUCACGCACAAACUCG	857	0.047	21	Y	-1	24	0	66	1193	241	1	2	1527	9	17	145	16	1	7	28	27	10	35	71	69	27	136	19	22	1	19	52	25
6353	Cluster_15773	2.91468	3.0249	1.14732	12.9322	0.00478544	0.0201201	vvi-MIR530b-isomiR	NC_012014.3_Vitis_vinifera_cultivar_PN40024_chromosome_8,_12X,_whole_genome_shotgun_sequence:18999855-18999955	101	481	0.935	72	0.004	-	UCUGCAUUUGCACCUGCACCU	373	0.046	21	N15	-1	1	0	11	456	8	5	0	481	0	4	21	5	0	4	9	12	1	7	7	5	0	11	1	0	0	0	1	2
37592	Cluster_719	16.9615	0.156055	0.876986	11.7033	0.00847166	0.0308263	vvi-MIR395h	NC_012007.3_Vitis_vinifera_cultivar_PN40024_chromosome_1,_12X,_whole_genome_shotgun_sequence:6566582-6566901	320	2412	4.69	46	0.96	+	GUUCCCUUGACCACUUCACUG	835	0.053	21	Y	-1	22	26	276	1842	154	80	12	2412	23	44	0	1	6	66	12	1	21	0	2	8	35	45	0	0	5	32	8	18
36321	Cluster_603	1.65551	-0.744541	1.20629	11.4497	0.00952711	0.0336152	mtr-MIR5741e/gra-MIR8685-like	NC_012007.3_Vitis_vinifera_cultivar_PN40024_chromosome_1,_12X,_whole_genome_shotgun_sequence:5536515-5536897	383	19781	38.461	3769	0.002	-	ACCUUUGACUGGUGAGUGCAUGAA	15355	0.004	24	Y	-1	3	59	5	27	96	799	18792	19781	1	9	0	0	0	2	0	1	2	0	0	0	12	0	0	0	2	3	0	0
15082	Cluster_23704	93.5738	0.569351	0.457299	11.342	0.0100134	0.0348626	vvi-MIR393b	NC_012019.3_Vitis_vinifera_cultivar_PN40024_chromosome_13,_12X,_whole_genome_shotgun_sequence:4265089-4265221	133	4704	9.146	449	0.971	+	UCCAAAGGGAUCGCAUUGAUCU	1687	0.022	22	Y	-1	6	4	51	2153	2338	5	147	4704	23	175	320	77	16	44	161	318	129	164	168	315	81	366	80	150	7	19	84	117
12850	Cluster_21674	66.5797	0.195749	0.484397	10.6353	0.0138707	0.0442859	vvi-MIR171b-isomiR	NC_012018.3_Vitis_vinifera_cultivar_PN40024_chromosome_12,_12X,_whole_genome_shotgun_sequence:5542345-5542534	190	5913	11.497	5909	0.187	-	UUGAGCCGCGUCAAUAUCUCC	4350	0.021	21	Y	-1	91	12	124	5635	44	6	1	5913	11	140	85	9	15	74	68	105	242	60	20	45	68	412	23	46	56	47	33	47
39167	Cluster_8623	711442	-0.308013	0.427233	10.4278	0.015259	0.0475563	vvi-MIR166h	NC_012011.3_Vitis_vinifera_cultivar_PN40024_chromosome_5,_12X,_whole_genome_shotgun_sequence:6740980-6741283	304	43794217	85151.5	227622	0.101	-	UCGGACCAGGCUUCAUUCCCC	28920320	0	21	Y	-1	26417	990	79465	43384025	66896	9971	226453	43794217	603185	1425501	961823	172999	373411	677456	1528551	808985	1197321	1033426	521536	1343674	321900	2673440	745354	612520	850926	766153	239578	396697
8668	Cluster_17878	4.14354	0.247903	0.785645	10.3535	0.0157882	0.0487421	novel_ddi-mir-7099-hairpin-like	NC_012015.3_Vitis_vinifera_cultivar_PN40024_chromosome_9,_12X,_whole_genome_shotgun_sequence:21822337-21822741	405	1063	2.067	1050	0.966	+	UUUUAAUUUUGAUAUGGCAAGUCA	427	0.131	24	Y	-1	8	29	1	25	40	68	892	1063	0	9	15	0	1	3	2	3	14	5	10	1	10	18	0	2	2	1	6	0
38418	Cluster_7938	30.2311	0.691098	0.487625	9.89558	0.0194749	0.0568482	vvi-MIR403c	NC_012011.3_Vitis_vinifera_cultivar_PN40024_chromosome_5,_12X,_whole_genome_shotgun_sequence:602544-603058	515	1955	3.801	42	0.834	+	UUAGAUUCACGCACAAACUCG	1075	0.055	21	N12	-1	33	57	82	1463	299	17	4	1955	7	23	165	19	4	13	27	37	13	43	100	89	44	179	21	22	11	23	58	32
19140	Cluster_2740	35.7663	2.36224	1.07913	9.04427	0.0287081	0.0756893	vvi-MIR399i	NC_012008.3_Vitis_vinifera_cultivar_PN40024_chromosome_2,_12X,_whole_genome_shotgun_sequence:4101751-4101930	180	18869	36.688	18761	0.998	+	CGCCAAAGGAGAGUUGCCCUG	16000	0.009	21	Y	-1	408	13	384	17879	165	11	9	18869	4	162	116	42	1	54	397	38	4	1	26	108	0	6	3	0	6	10	18	55
19028	Cluster_27299	250.849	-1.18039	1.62815	7.20738	0.0655735	0.137915	TAS4b_majspD4minus	NC_012020.3_Vitis_vinifera_cultivar_PN40024_chromosome_14,_12X,_whole_genome_shotgun_sequence:21534542-21535069	528	2932436	5701.7	2898922	0.283	.	UGAAGGUCCGAGGUAGAGGCA	1951650	0.001	21	N6	7566.3	7245	635	13294	2878595	24122	2272	6273	2932436	1	6	7	0	0	4	13	16	5	3	6	29	4	15	11	11	491	209	65	77
19863	Cluster_28062	8.79552	-0.62574	0.839029	7.11742	0.068248	0.142105	vvi-MIR3627	NC_012020.3_Vitis_vinifera_cultivar_PN40024_chromosome_14,_12X,_whole_genome_shotgun_sequence:28302570-28302659	90	14317	27.837	14310	0.531	.	CUUGUCACAGGAGAGCGGCGA	5538	0.017	21	N6	63	67	0	491	9837	3850	59	13	14317	6	12	13	1	12	25	17	33	4	6	0	2	7	20	2	2	9	2	1	1
39179	Cluster_8634	6.89167	-0.477837	0.86561	6.21596	0.101563	0.189623	vvi-miR7122	NC_012011.3_Vitis_vinifera_cultivar_PN40024_chromosome_5,_12X,_whole_genome_shotgun_sequence:6820608-6821071	464	128645	250.132	128643	0.002	-	UUACACAGAGAGAUGACGGUGG	109107	0.003	22	Y	-1	498	17	259	4400	122593	832	46	128645	12	17	5	0	5	7	6	9	25	0	3	0	0	41	0	10	4	4	3	1
23825	Cluster_31664	1.19026	-0.300243	1.29123	5.458	0.141172	0.241618	vvi-MIR828a_star_sequenced	NC_012022.3_Vitis_vinifera_cultivar_PN40024_chromosome_16,_12X,_whole_genome_shotgun_sequence:21724236-21724615	380	1336	2.598	1330	0.96	+	AGAUGCUCAUUUGAGGAAGCAA	411	0.082	22	N14	-1	7	37	395	389	454	27	27	1336	3	13	2	0	0	0	1	0	0	3	0	2	1	1	0	0	3	0	1	0
39865	Cluster_926	0.983302	-2.13843	1.98962	1.17716	0.758488	0.819863	Pant128_majsp_D1plus	NC_012007.3_Vitis_vinifera_cultivar_PN40024_chromosome_1,_12X,_whole_genome_shotgun_sequence:8079523-8080268	746	9716	18.891	9615	0.231	.	UUGUGCAAGAGGCUCGGCAUC	4555	0.073	21	N5	275.9	249	6	192	8869	281	28	91	9716	0	1	0	0	0	0	0	7	2	2	0	0	0	0	0	1	6	0	5	0
18649	Cluster_26950	4.91786	-0.653664	0.823805	0.882719	0.829596	0.873965	MYBA6_majsp_D6plus	NC_012020.3_Vitis_vinifera_cultivar_PN40024_chromosome_14,_12X,_whole_genome_shotgun_sequence:16885252-16885857	606	764	1.485	562	0.581	.	CUGUCAGAGGAUGGAAUUUCA	154	0.298	21	N5	22.2	38	21	32	588	49	16	20	764	9	2	11	1	0	3	6	2	7	9	9	16	0	17	15	8	6	0	1	9
10225	Cluster_192945_P98	1.72894	0.264498	1.18194	0.74619	0.86229	0.8982	vvi-MIR858	NC_012023.3_Vitis_vinifera_cultivar_PN40024_chromosome_17,_12X,_whole_genome_shotgun_sequence:2439432-2439714	283	187	0.364	16	0.193	.	UUCGUUGUCUGUUCGACCUUG	96	0.16	21	N0	0.5	32	0	4	141	8	1	1	187	1	7	0	0	0	4	4	10	8	0	1	8	1	3	1	0	1	1	1	0
38490	Cluster_8003	0.198563	-0.406599	3.51362	0.467988	0.925866	NA	mypred828-target_majsp_phase_22_VIT_05s077g01360	NC_012011.3_Vitis_vinifera_cultivar_PN40024_chromosome_5,_12X,_whole_genome_shotgun_sequence:1105706-1107623	1918	1100	2.139	1094	0.71	.	UUGGGACCAUUUGAAGAGCAA	178	0.298	21	N5	21.2	9	1	24	862	25	15	164	1100	0	1	0	0	0	1	0	0	0	0	0	0	0	0	0	0	0	1	0	0
24662	Cluster_32423	0.0848467	0.355329	4.23555	-0.306958	1	NA	vvi-miR5225	NC_012023.3_Vitis_vinifera_cultivar_PN40024_chromosome_17,_12X,_whole_genome_shotgun_sequence:5927854-5927954	101	15142	29.441	18	0.959	+	UCCCAGGAGAGAUGGCACCUGC	13742	0.009	22	N13	-1	265	3	32	153	14495	171	23	15142	0	1	0	0	0	1	0	0	0	0	0	0	0	1	0	0	0	0	0	0
16028	Cluster_24562	6840.3	0.172964	0.254978	0.678349	0.49755	0.986879	miR482trigger, sheet "a". TAS11. Cluster_24562	NC_012019.3_Vitis_vinifera_cultivar_PN40024_chromosome_13,_12X,_whole_genome_shotgun_sequence:15496204-15497757	1554	1470615	2859.4	1287301	0.391	.	UCGGAUAAAGGGUUAUACUUC	143659	0.011	21	N5	1736.6	18099	7712	62902	1063241	230705	31348	56608	1470615	3403	13145	14029	1830	733	7544	15892	19275	15516	3550	6252	20814	6358	32809	7594	5782	3587	5373	7954	6292
Table S3d summary. Differential expression of miRNAs in berries under different developmental stages. miRNAs that are up-regulated during berry development have log2FC column in bold.
miRNA/Phasi trigger	log2 FC	P value*	Validated Targets	Phasi Locus	ShortStack Phase Score	Pearson corr. to 3 wk time progression	P val, inverse correlation target mRNAs#
vvi-MIR164c	-1.87	6.88e-11	Three NAC domain TFs			-0.97	2e-08
vvi-MIR167c	-1.79	5.1e-07	ARF6/8-like TFs			-0.96
vvi-MIR396a	-0.31	1.14e-06	7 GRFs; bZIP#.			-0.93	0.02
novel_aly-MIR3435-	1.45	6.25e-06	None predicted
hp-like
vvi-MIR166a-3p	-1.2	4.36e-05	REVOLUTA_2			-0.97
vvi-MIR396b	-0.3	4.38e-05	GRFs see above			-0.95
vvi-MIR394c	-1.18	4.38e-05	F-box X6/At1g27340-like#			-0.93	0.0003, 0.02
vvi-MIR168	-0.97	0.00015	AGO1			-0.95
novel vvi-MIR159d-like	-2.39	0.0002	None predicted
vvi-miR4376	-0.6	0.00062				-0.97
			calcium ATPase10 5' UTR intron2
vvi-MIR827	-0.32	0.00071	None predicted; canonical target is Major Facilitator Superfamily SPX transporter			-0.96	0.0003
vvi-MIR3632-3p, 22 nt species	-0.83	0.00079	See Supplementary Table 3c targets			-0.99
			NB-ARC
vvi-MIR530a	2.57	0.00082	See Table 3 targets			0.999
			AGO1;
			Plus3 domain; PPR DYW deaminase
vvi-MIR162	-0.13	0.001	DICER1#		650	-0.96	0.0002
vvi-MIR166b	-0.47	0.0039	Six homeobox-START domain leucine zipper TFs			-0.99	0.004
vvi-MIR403d	0.72	0.0042	AGO2			0.96
vvi-MIR156d	-0.77	0.005	SPL TFs #			-1	0.02, 0.11
vvi-MIR393a	0.62	0.0051	auxin receptor TIR1	NC_012013.3_chr7:2354212-2355484 TIR1-like; VIT_07s0104g01320;	5000	0.98	0.0007
			F-box protein#	NC_012020.3_chr14:5734480-5735060, TIR1-like LRR-F-box, VIT_14s0030g01240
			bHLH	NC_012020.3_chr14:25059817-25060229, TIR1-like LRR-F-box, 14s0068g01330	1075
				NC_012011.3_chr5:15017243-15018668 bHLH; VIT_05s0029g00390
					1272
					96.1		0.02
vvi-MIR403a	0.73	0.0052	AGO2			0.97
novel vvi-MIR3631b-like, 24 nt species	-0.61	0.0054	protein kinase SYM10 Nod factor recognition protein			-0.98
vvi-MIR403f	0.62	0.007	AGO2			0.95
vvi-MIR3630-3p	0.78	0.008	None predicted			0.99	0.0007, 0.004
vvi-MIR172d	-0.41	0.0097	APETELA2#			-0.95	7E-5, 0.03
vvi-MIR403e	0.69	0.011	AGO2			0.97
vvi-MIR171c	-3.08	0.0116	Five GRAS family transcription factors (scarecrow-like protein)			-0.79	1e-05
vvi-MIR482	-0.5	0.014	NBS-LRR	NC_012019.3_chr13:21550011-21551376^	1146	-0.999
novel-gra-MIR8761-like; 24 nt species	-1.34	0.015	None predicted			-0.92
vvi-MIR3634*; 23 nt species	0.6	0.016	None predicted	mature: none predicted		-0.26
vvi-MIR403b	1.09	0.016	AGO2			0.98
vvi-MIR530b	3.02	0.02	Plus3 domain#; PPR DYW deaminase; AGO1 predicted			0.99	0.03
vvi-MIR395l,h	-0.64	0.03	AST68, Low affinity sulfate transporter ; ATP sulfurylase 1			-0.98	0.0005, 0.02
novel mtr-MIR5741e/gra-MIR8685	-0.74	0.034	None predicted			-0.99
vvi-MIR393b	0.57	0.035	see above TIR1-L			0.99
vvi-MIR171b isomiR	0.2	0.044	GRAS family transcription factor (scarecrow-like protein)			-0.65	0.03
vvi-MIR166h	-0.31	0.048	homeobox-leucine zipper protein			-0.96
novel ddi-mir-7099-hairpin-like, 24 nt species	0.25	0.049	None predicted			-0.34
vvi-MIR828a_star_	-1.62	5.3e-14	miR828 targets MYB transcription factors;TAS4	VIT_17s0000g08480		-0.95
sequenced$				Validated degradome	1330
				NC_012023.3_chr17:9703075-9703885
	-1.26	2e-10		MYB156 Validated degradome	2233	-0.98
				VIT_14s0066g01220
				NC_012020.3_chr14:27707780-27708673
	-0.97	4e-09		Validated degradome	1260	-1
				VIT_09s0002g01380
				NC_012015.3_chr9:1161752-1163111
	-0.87	2.9e-05		reported degradome MYBPAL1	476	-0.99	7E-6&
				VIT_00s0341g00050
				NW_003724301.1_unplaced_scaffold_341:36614-37231
	-2.14	0.82		reported degradome	276	-0.29
				VIT_01s0127g00730
				NC_012007.3_chr1:8079523-8080268
TAS4a	-0.77	1.4e-11		chr14:21607803-21608825	18631	-0.99
TAS4b	-1.18	0.14			7566	-0.99
				chr14:21534542-21535069
TAS4c	5.93	1.2e-05		chr1: 2961251:2961747	3375	0.98
MYBA7; TAS4b-3'D4(-) trigger	-0.92	0.009		VIT_14s0006g01280	83	-0.99
				NC_012020.3_chr14:16644828-16645711
MYBA6; TAS4a-3'D4(-) trigger	-0.65	0.87		VIT_14s0006g01290	22.2	0.02	0.04
				NC_012020.3_chr14:16885252-16885857
Unknown trigger	-1.39	1.4e-16	No predicted targets for abundant phasi-RNA	5'UTR VIT_18s0089g00510	35.1	-0.98
				NC_012024.3_chr18:28294527-28296187
*Bonferroni-Hochberg False Discovery Rate-adjusted (α=0.1) 34,074 independently filtered (for low counts) siRNA-producing loci tested.
^ log2FC by development = -0.21, P = 0.003. Candidate TAS-like locus validated by degradome; tasiRNAs not predicted to target mRNAs.
$ log2FC = -0.3 by development of miR828 inferred by abundance of miR828* species (P = 0.24).
# data for differentially expressed miRNA target loci in red variety berry skins over four developmental timepoints, from Massonnet et al. (2017). See Supplementary Table 2b for fold changes
& P value for the predicted target E3 ligase VIT_08s0040g03270 inverse relationship to MYBPAL1 siRNA-3'D3(-). Also see up-regulation of MYB itself (p = 0.11), suggesting functional inverse correlation to self siRNAs.
[truncated: 32 more columns]
